# Supplementary material for: Supramolecular control during triplet sensitized geometric isomerization of stilbenes encapsulated in a water soluble organic capsule
Source: Royal Society of Chemistry journal article supplement (doi:10.1039/c2pp25115a), 2012-05-25
Supplement: c2pp25115a.pdf [file c2pp25115a.pdf]

## Electronic Supporting Information

### Supramolecular Control During Triplet Sensitized Geometric Isomerization of Stilbenes Encapsulated in a Water Soluble Organic Capsule

Shampa R. Samanta, Anand Parthasarathy and V. Ramamurthy\*

Department of Chemistry, University of Miami, Coral Gables, Miami, Florida, USA

| Figure No    | Title                                                                                                  | Page  |
|--------------|--------------------------------------------------------------------------------------------------------|-------|
|              | Experimental Section                                                                                   | S2-S3 |
| Figure S1    | <sup>1</sup> H NMR spectra of capsular assemblies                                                      | S4    |
| Figure S2-S4 | <sup>1</sup> H NMR titration spectra of <b>9</b> , <b>10</b> and <b>11</b> with OA                     | S5-S7 |
| Figure S5-S6 | 2D-DOSY spectrum of <b>9</b> <sub>2</sub> @OA <sub>2</sub> and <b>10</b> <sub>2</sub> @OA <sub>2</sub> | S8    |
| Figure S7    | 2D-DOSY spectrum of <b>11</b> <sub>2</sub> @OA <sub>2</sub>                                            | S9    |
| Figure S8    | <sup>1</sup> H NMR competition study of <i>cis</i> and <i>trans</i> - <b>1</b>                         | S10   |
| Figure S9    | <sup>1</sup> H NMR competition study of <i>cis</i> and <i>trans</i> - <b>3</b>                         | S11   |
| Figure S10   | <sup>1</sup> H NMR competition study of <i>cis</i> and <i>trans</i> - <b>4</b>                         | S12   |
| Figure S11   | <sup>1</sup> H NMR competition study of <i>cis</i> and <i>trans</i> - <b>2</b>                         | S13   |
| Figure S12   | <sup>1</sup> H NMR titration spectra of <b>7</b> with CB[7]                                            | S14   |
| Figure S13   | Triplet quenching of <b>10</b> @OA <sub>2</sub> by <b>9</b>                                            | S15   |
| Figure S14   | Triplet quenching of <b>10</b> @OA <sub>2</sub> by <b>8</b>                                            | S15   |
| Table S1     | Diffusion constants of capsular assemblies                                                             | S16   |

## Experimental Section

*Materials and Methods:* Bispyridylethylene (**8**), 4-stilbazole (**9**), 4,4'-dimethylbenzil (**10**), 9-fluorenone (**11**), and 1'-acetonaphthone (**12**), 2'-acetonaphthone (**13**), (from Sigma-Aldrich/Acros) were used as received. The host OA, *cis* and *trans* stilbene derivatives (**1-6**), methylstilbazolium salt (**7**) were synthesized following literature procedure.

*NMR experiments:* NMR studies were carried out on a Bruker 500 MHz NMR spectrometer at 25 °C. Diffusion coefficients for the capsular assemblies were determined by using gradient field in Bruker 500 MHz NMR spectrometer at 25 °C. Data were collected by using 'stebpgls' pulse sequence,  $\Delta = 99.9$  ms,  $\delta = 3.6$  ms, pulsed field gradients were incremented linearly from 1.06 (2 % of field gradient strength) to 50.35 G/cm (95 % of field gradient strength) in 16 steps with each step consisting of 8 scans. The collected data were processed by  $T_1/T_2$  relaxation module in the TOPSIN 2.1 software.

*Phosphorescence emission experiments:* Phosphorescence lifetimes were measured on an OB920 fluorometer (Edinburgh Analytical Instruments) using a pulsed microsecond xenon lamp as excitation source and multi-channel scaling for data acquisition at  $\lambda_{\text{ex}}$  318 nm and  $\lambda_{\text{em}}$  560 nm.

*$^1\text{H}$  NMR and diffusion NMR studies with guests@ (OA):* 600  $\mu\text{L}$  of a  $\text{D}_2\text{O}$  solution of host OA (1 mM OA in 10 mM  $\text{Na}_2\text{B}_4\text{O}_7$ ) was taken in a NMR tube and to this 0.25 equivalent increment of guest (2.5  $\mu\text{L}$  of a 60 mM solution in  $\text{DMSO}-d_6$ ) was added. The  $^1\text{H}$  NMR experiments were carried out after shaking the NMR tube for 5 min after each addition. Completion of complexation was monitored by disappearance of the free host OA signals upon the addition of guest. Further, diffusion experiments were carried out to characterize capsular assemblies.

*Sample preparation for luminescence measurements:* Capsular assemblies of **10** in 1 mM concentration of OA were made separately by adding 5  $\mu\text{L}$  of 60 mM solution of guest (in DMSO solution) to 0.6 mL of 1 mM OA in 10 mM borate buffer in  $\text{H}_2\text{O}$  for a 2:1 (H:G) capsular assembly. This solution was then diluted to make final guest solution of  $10^{-5}$  M. Standard solution of quencher **7** was prepared in 10 mM borate buffer solution. In the case of *cis/trans* **1** and **3** capsular assembly was prepared by adding 5  $\mu\text{L}$  of 60 mM solution of guest (in DMSO solution) to 0.6 mL of 1 mM OA in 10 mM borate buffer in  $\text{H}_2\text{O}$ . Similarly it was further diluted

appropriately with 10 mM buffer solution to have the required concentration of bound guest. The solutions were deoxygenated by purging with nitrogen or argon gas for 60 min prior to the emission studies. To this solution calculated amount of quencher solution was added to make solutions with known quencher concentrations. The bimolecular quenching rate constants were derived from the slope of the plot of quencher concentration vs. triplet state decay constant ( $1/\tau$ ).

*Sample preparation for sensitized photoisomerization:* For sensitization experiments, the capsules of  $(\mathbf{11})_2@(\text{OA})_2$ ,  $(\mathbf{12})_2@(\text{OA})_2$  and  $(\mathbf{13})_2@(\text{OA})_2$  were prepared by adding 20  $\mu\text{L}$  of 60 mM standard guest solution to 0.6 mL of 2 mM of OA in 20 mM of borate buffer solution and stilbenes@ $(\text{OA})_2$  were made by adding 10  $\mu\text{L}$  of 60 mM standard guest solution to 0.6 mL of 2 mM of OA in 20 mM of borate buffer solution.  $^1\text{H}$  NMR spectrum of this solution was recorded to confirm the formation of capsular assemblies. Then these two solutions were mixed together in equal amount and  $^1\text{H}$  NMR were recorded and observed that each capsular assembly was intact in presence of the other. Selective excitation of encapsulated donors in presence of stilbenes@ $(\text{OA})_2$  was achieved with 450 W medium pressure mercury lamp using 380 nm cut off filter for  $(\mathbf{11})_2@(\text{OA})_2$  and 370 nm cut off filter for  $(\mathbf{12})_2@(\text{OA})_2$  and  $(\mathbf{13})_2@(\text{OA})_2$ . For acceptor **7**, sensitization was carried out in  $\text{CD}_3\text{CN}$  and in buffered  $\text{D}_2\text{O}$  by free donor and encapsulated donor respectively using 420 nm cut off filter.

*NMR competition study with stilbene derivatives:* For the competition studies with *trans* and *cis* stilbene derivatives, the complex of stilbene@ $(\text{OA})_2$  was taken in NMR tube. A solution of other isomer in  $\text{DMSO}-d_6$  was gradually added to it and the binding behavior was monitored by  $^1\text{H}$  NMR. For example, in the case of guest **1**, addition of one equivalent of *trans* derivative (with respect to one equivalent of *cis* derivative) to *cis* complex (*cis*-**1**@ $(\text{OA})_2$ ) resulted in complete displacement of the encapsulated *cis*-**1** within 1 h. On the other hand, the reverse experiment carried out by adding 1.5 equivalents of *cis* counterpart, to *trans*-**1**@ $(\text{OA})_2$  (with respect to one equivalent *trans*) resulted in no displacement of encapsulated *trans*-**1** from its capsular complex.

*Synthesis of methylstilbazolium salt (7).* In 10 mL of acetonitrile 1 g of stilbazole was dissolved and to this solution 10 equivalent of MeI was added and refluxed for 2 h. After that the solvent and excess MeI was distilled out. Product was extracted in  $\text{CHCl}_3$  layer and dried over  $\text{Na}_2\text{SO}_4$ .  $\text{CHCl}_3$  was distilled out to obtain pure product of *methylstilbazolium salt* with yield 875 mg.

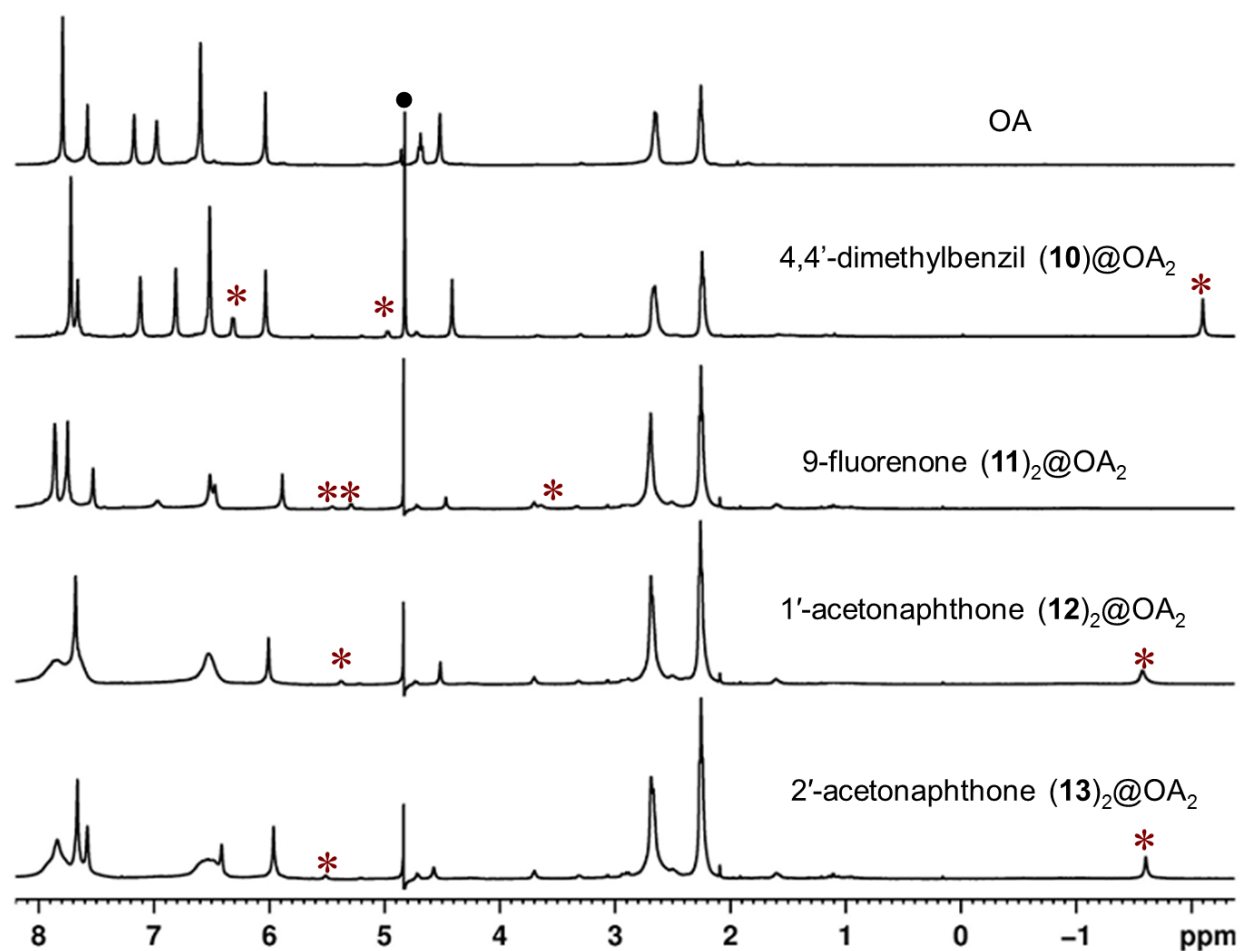

**Figure S1**  $^1\text{H}$  NMR spectra of capsular assemblies of donors in 10 mM borate buffer (500 MHz,  $[\text{OA}] = 1 \text{ mM}$ ). ‘\*’ represents bound guest signal and ‘•’ represents the residual proton resonances from  $\text{D}_2\text{O}$ .

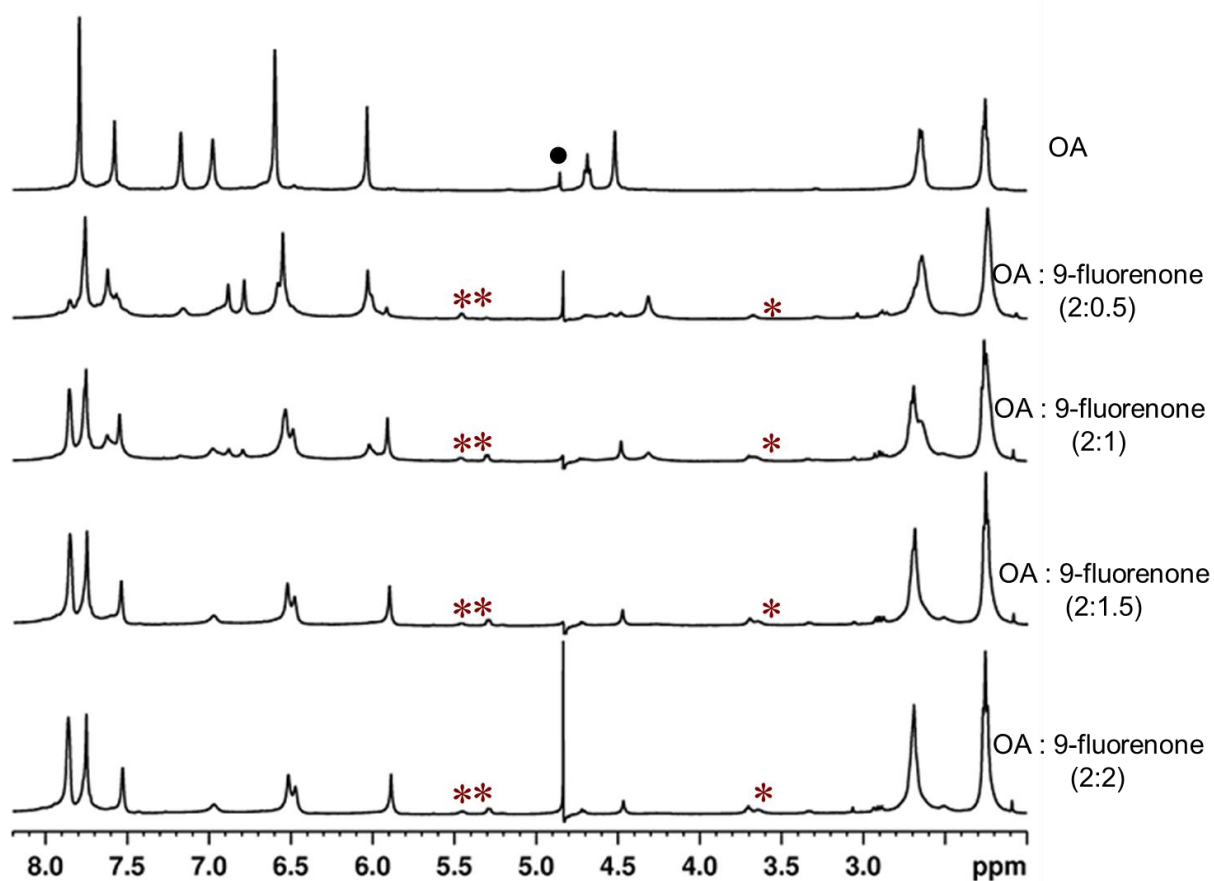

**Figure S2**  $^1\text{H}$  NMR titration spectra of 9-fluorenone (**11**) with OA (500 MHz,  $[\text{OA}] = 1 \text{ mM}$ , buffer 10 mM). ‘\*’ represents bound guest signal and ‘•’ represents the residual proton resonances from  $\text{D}_2\text{O}$ .

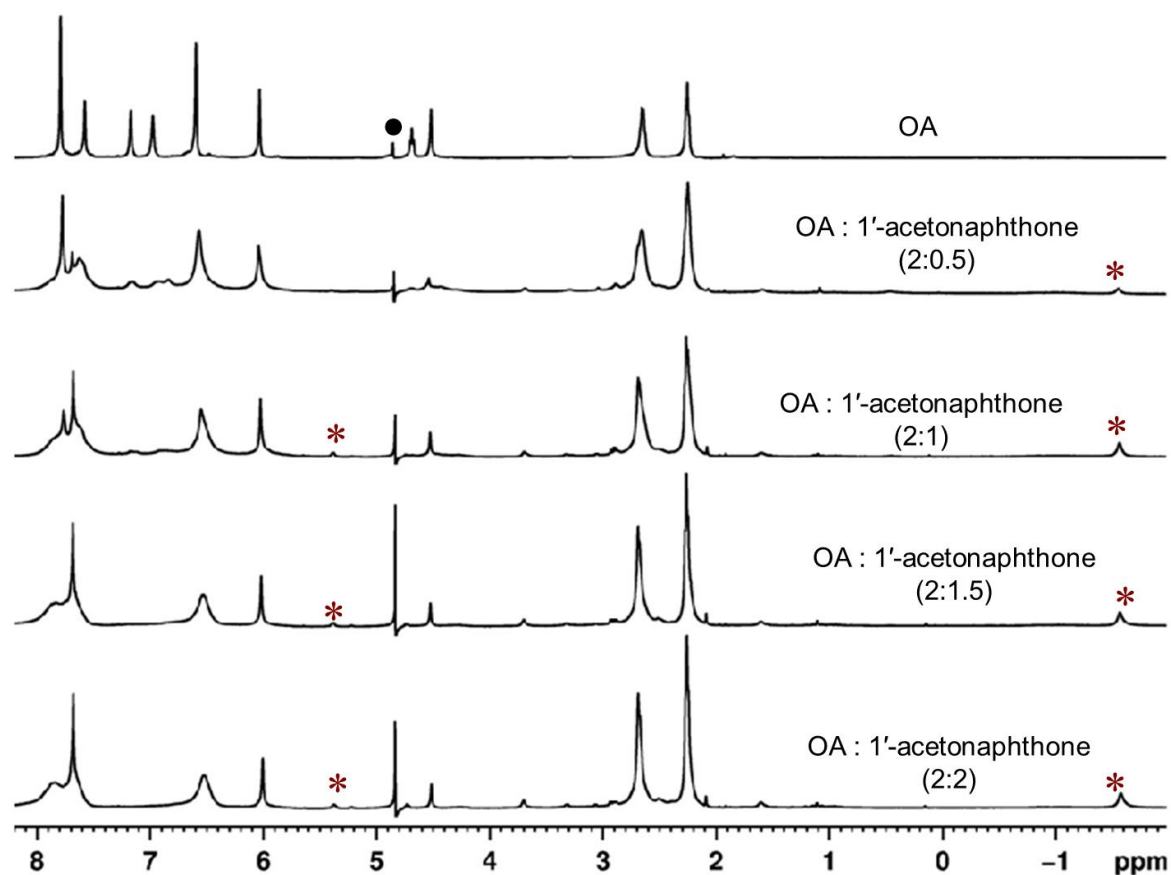

**Figure S3**  $^1\text{H}$  NMR titration spectra of 1'-acetonaphthone (**12**) with OA (500 MHz,  $[\text{OA}] = 1$  mM, buffer 10 mM). '\*' represents bound guest signal and '•' represents the residual proton resonances from  $\text{D}_2\text{O}$ .

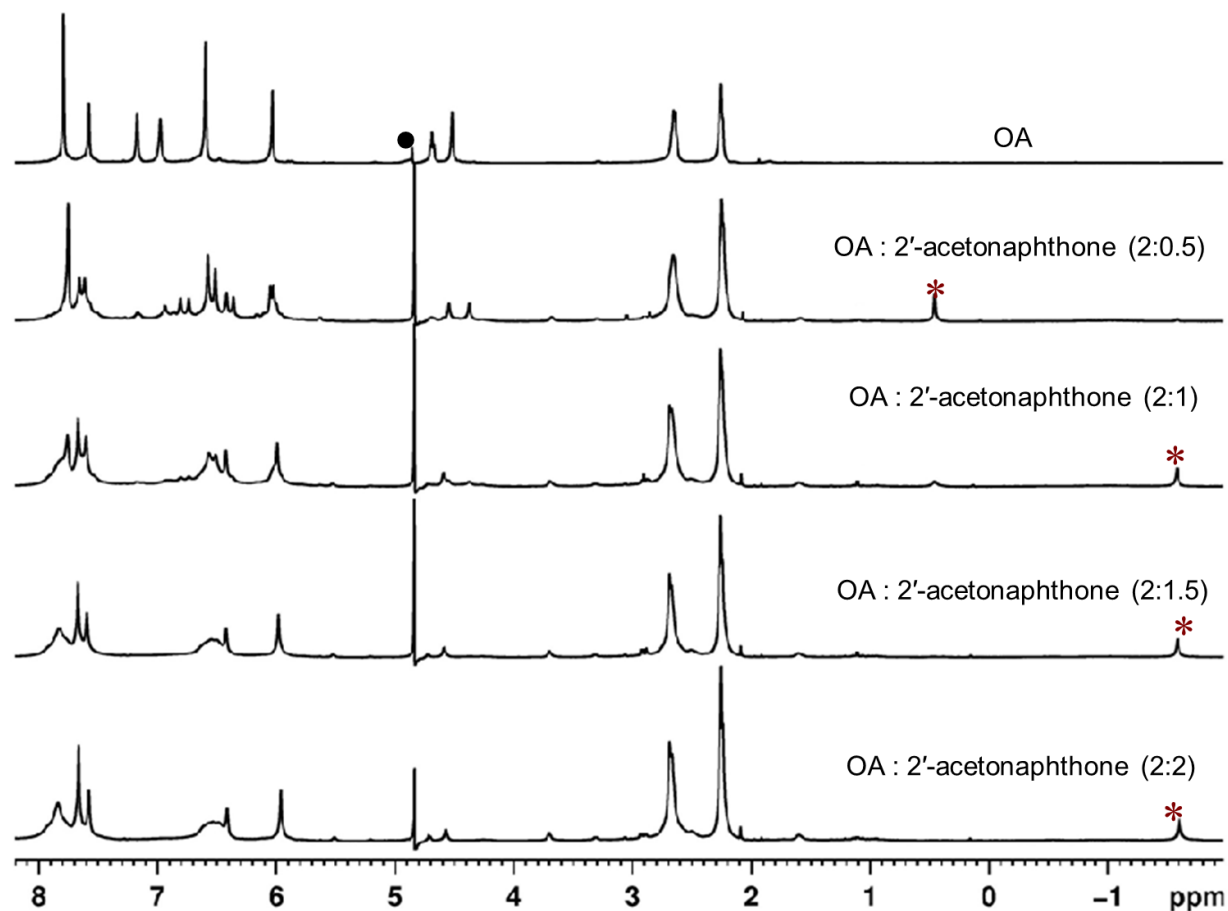

**Figure S4**  $^1\text{H}$  NMR titration spectra of 2'-acetonaphthone (**13**) with OA (500 MHz,  $[\text{OA}] = 1$  mM, buffer 10 mM). '\*' represents bound guest signal and '•' represents the residual proton resonances from  $\text{D}_2\text{O}$ .

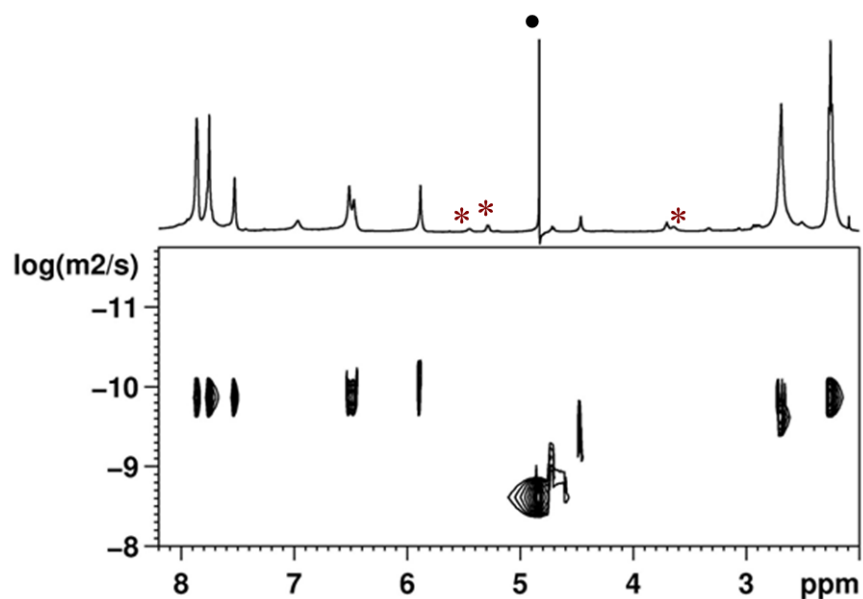

**Figure S5** 2D-DOSY spectra of 9-fluorenone (**11**)<sub>2</sub>@ OA<sub>2</sub> (500 MHz, [OA] = 1 mM, buffer 10 mM). ‘\*’ represents bound guest signal and ‘•’ represents the residual proton resonances from D<sub>2</sub>O.

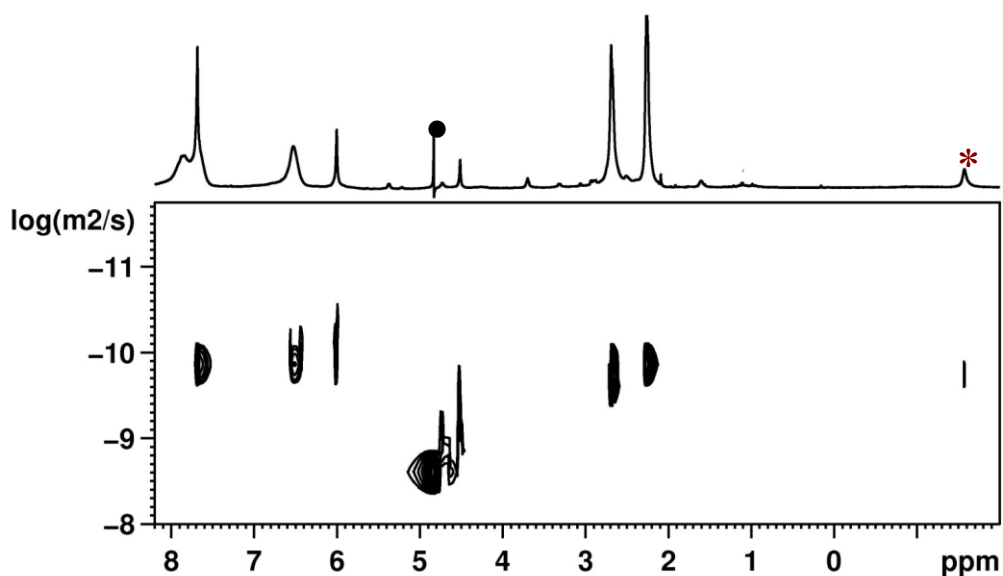

**Figure S6** 2D-DOSY spectra 1'-acetonaphthone (**12**)<sub>2</sub>@ OA<sub>2</sub> (500 MHz, [OA] = 1 mM, buffer 10 mM). ‘\*’ represents bound guest signal and ‘•’ represents the residual proton resonances from D<sub>2</sub>O.



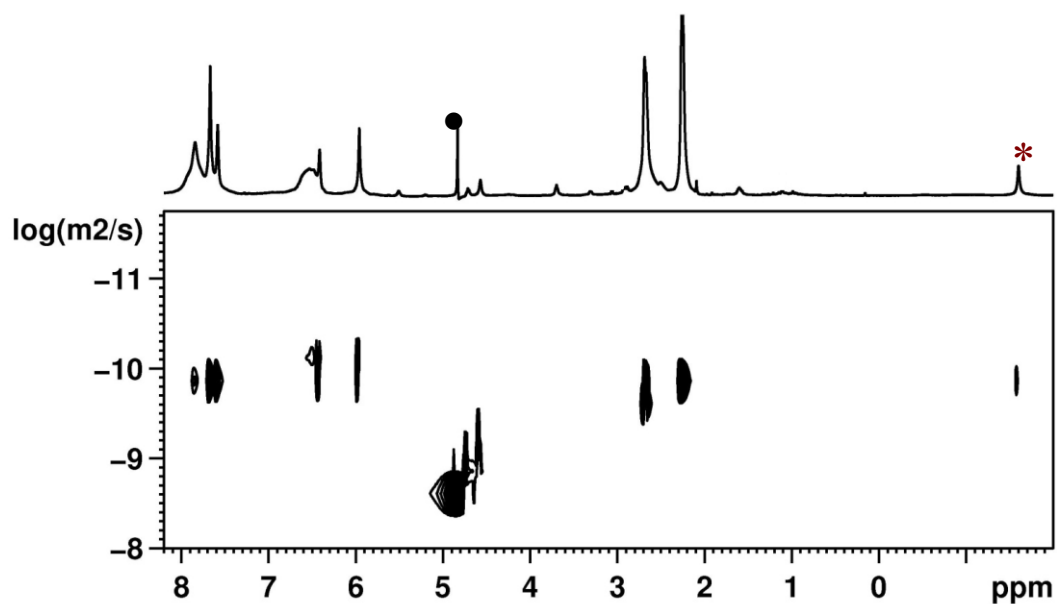

**Figure S7** 2D-DOSY spectra 2'-acetonaphthone (**13**)<sub>2</sub>@ OA<sub>2</sub> (500 MHz, [OA] = 1 mM, buffer 10 mM). '\*' represents bound guest signal and '•' represents the residual proton resonances from D<sub>2</sub>O.

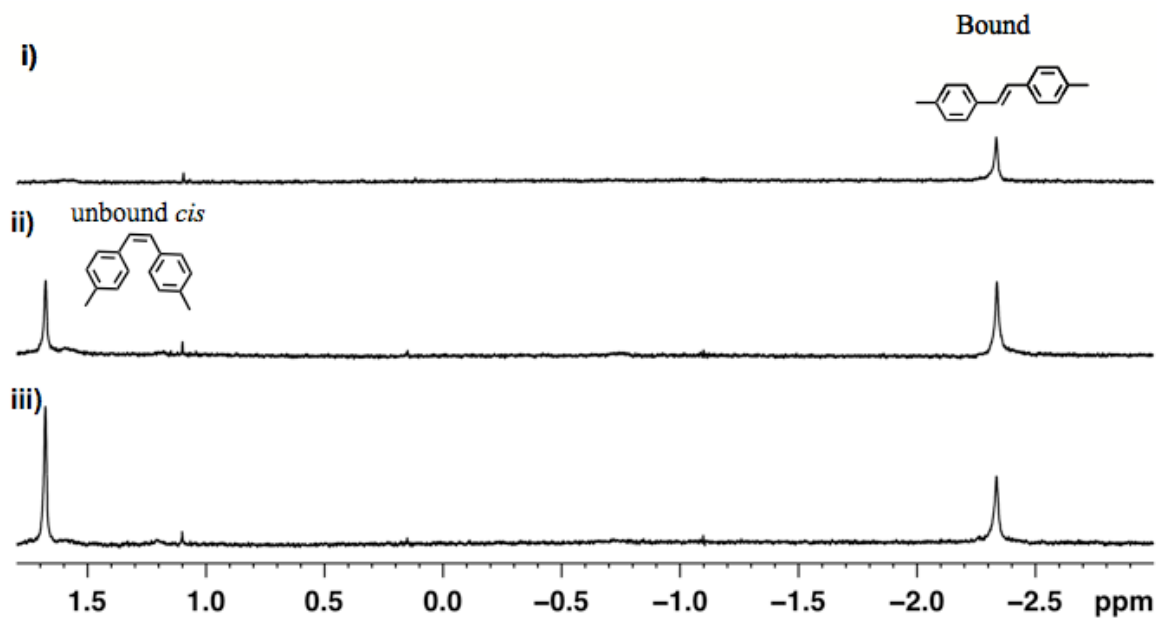

**Figure S8** Partial  $^1\text{H}$  NMR competition experiments between corresponding *trans* and *cis* isomers of **1** with OA, showing the formation of the capsule with the more preferred isomer in buffered  $\text{D}_2\text{O}$  (500 MHz). i) 1:2 complex of *trans*-**1** in OA. ii) Upon addition of 1 eq of *cis*-**1** to i. iii) Upon addition of 1.5 eq of *cis*-**1** to i.

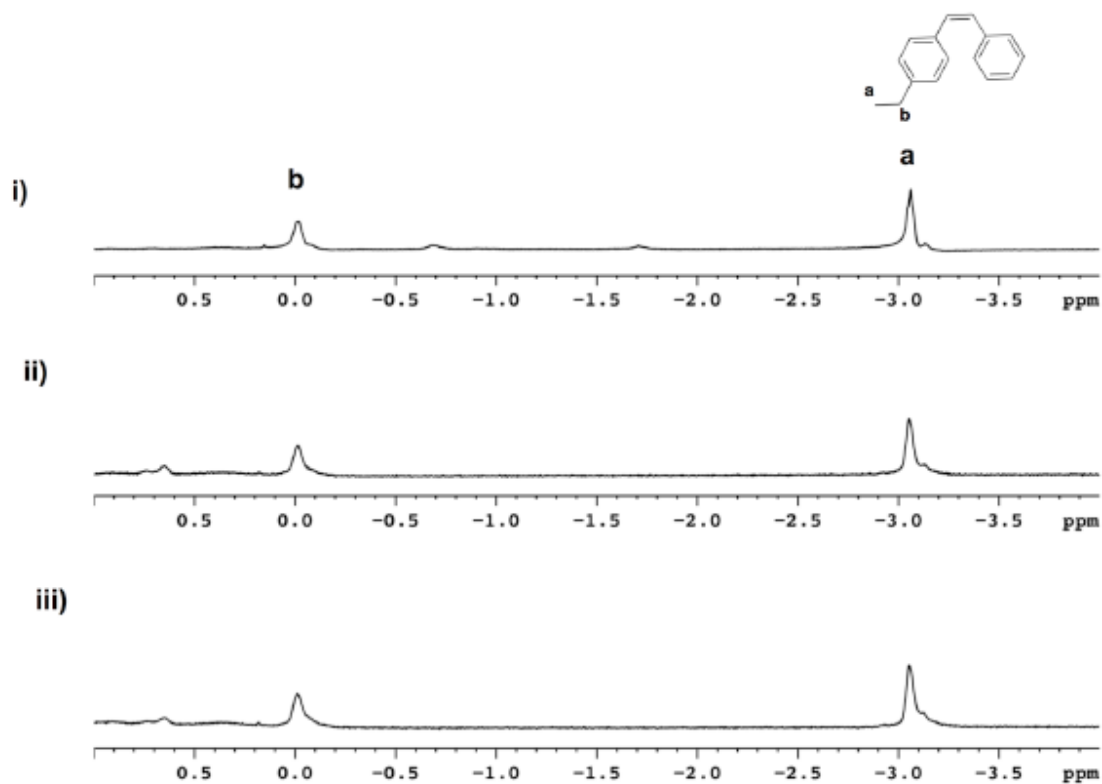

**Figure S9** Partial <sup>1</sup>H NMR competition experiments between corresponding *trans* and *cis* isomers of **3** with OA, showing the formation of the capsule with the more preferred isomer in buffered D<sub>2</sub>O (500 MHz). i) 1:2 complex of *cis*-**3** in OA. ii) Upon addition of 0.5 eq of *trans*-**3** to i. iii) Upon addition of 1.5 eq of *cis*-**3** to i.

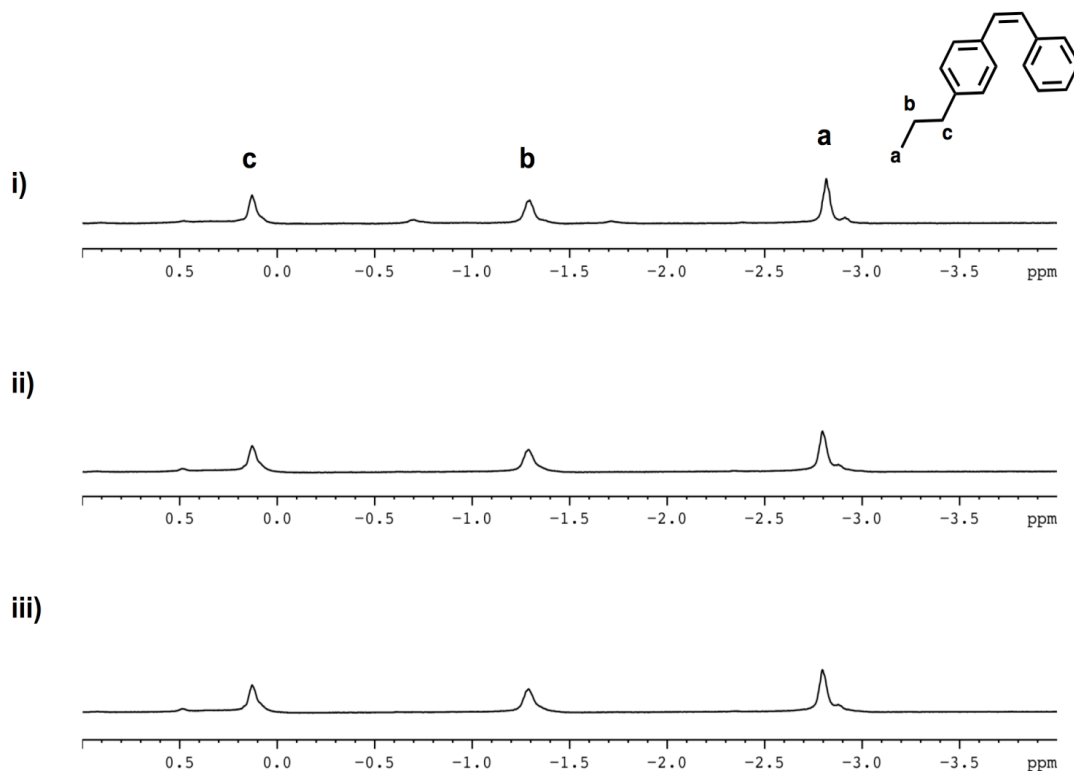

**Figure S10** Partial  $^1\text{H}$  NMR competition experiments between corresponding *trans* and *cis* isomers of **4** with OA, showing the formation of the capsule with the more preferred isomer in buffered  $\text{D}_2\text{O}$  (500 MHz). i) 1:2 complex of *cis*-**4** in OA. ii) Upon addition of 0.5 eq of *trans*-**4** to i. iii) Upon addition of 1.5 eq of *trans*-**4** to i.

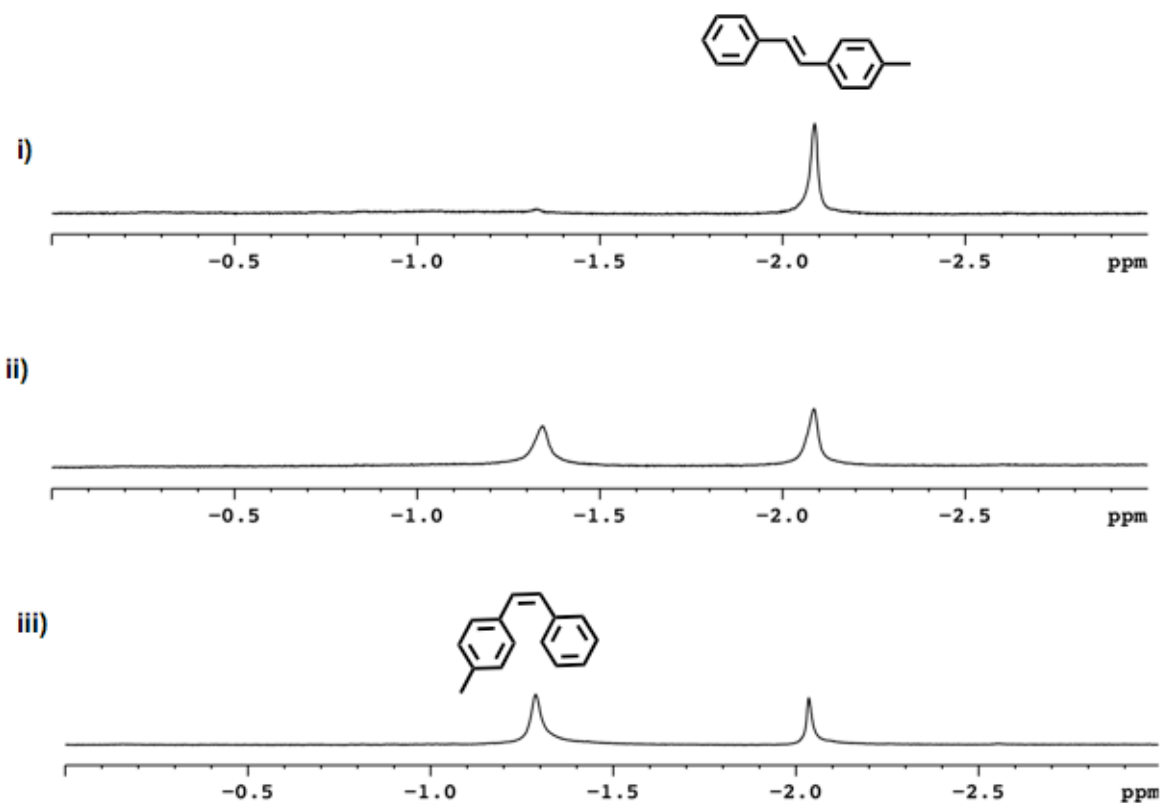

**Figure S11** Partial  $^1\text{H}$  NMR competition experiments between corresponding *trans* and *cis* isomers of **2** with OA, showing the formation of the capsule with the more preferred isomer in buffered  $\text{D}_2\text{O}$  (500 MHz). i) 1:2 complex of *trans*-**2** in OA. (ii) upon addition of 0.5 eq of *cis*-**2** to i. (iii) upon addition of 1.5 eq of *cis*-**2** to i.

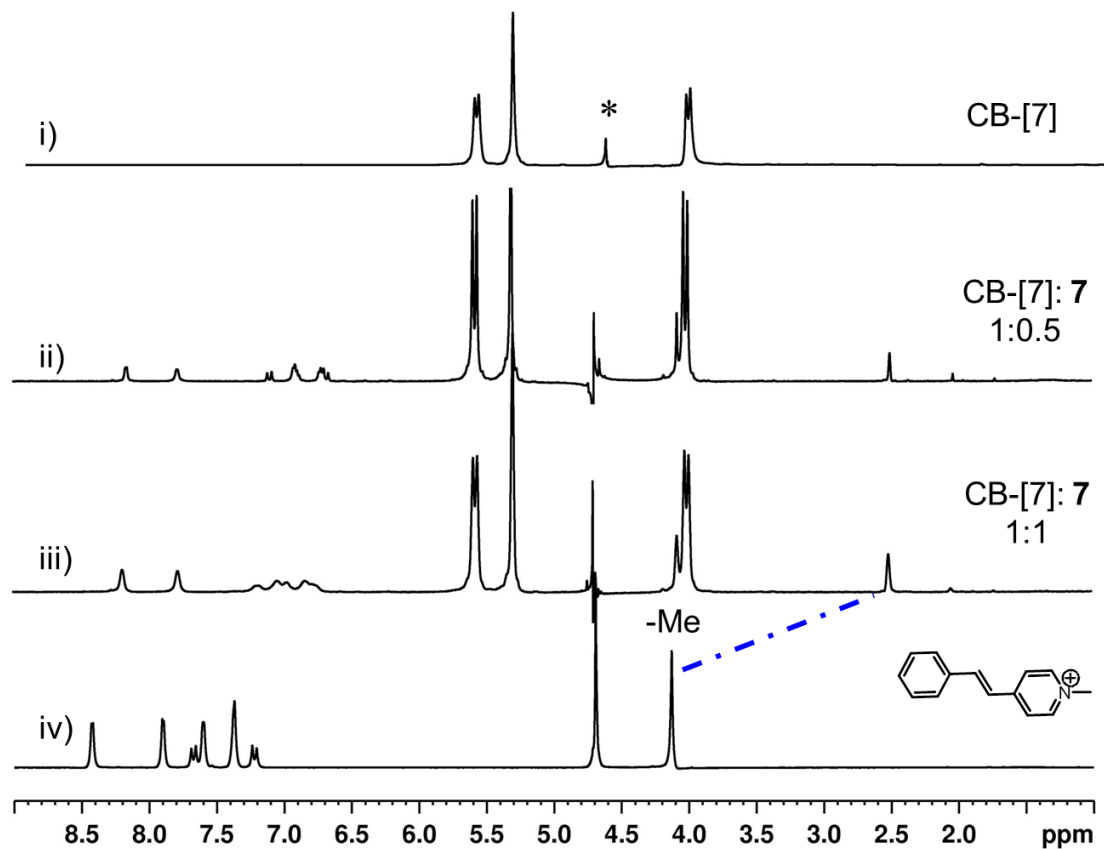

**Figure S12**  $^1\text{H}$  NMR of titration of CB-[7] with guest **7** in  $\text{D}_2\text{O}$  (500 MHz). i) 1 mM CB-[7] in  $\text{D}_2\text{O}$  ii) Upon addition of 0.5 eq of **7** to i. iii) Upon addition of 1 eq of **7** to i. iv) 1 mM free **7** in  $\text{D}_2\text{O}$ . '\*' represents the residual proton resonances from  $\text{D}_2\text{O}$ .

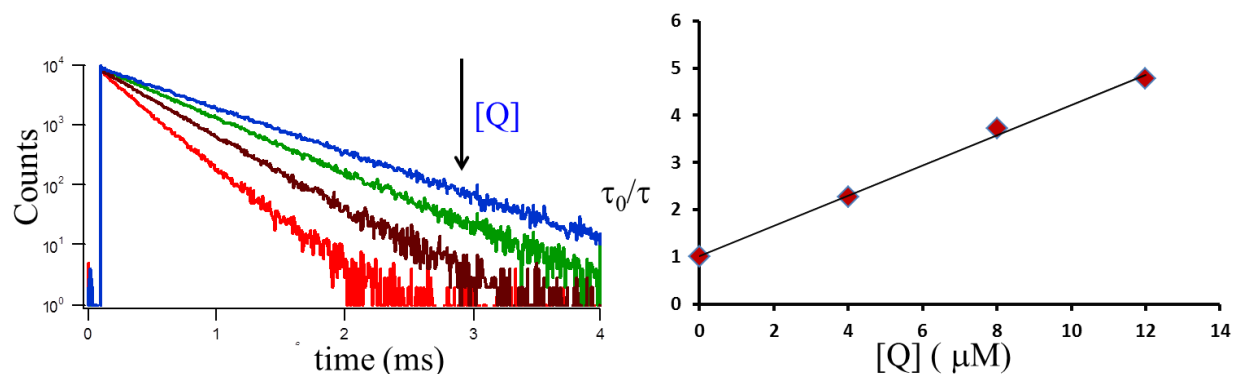

**Figure S13** (left) Plot showing the quenching of triplet lifetime of **10**@OA<sub>2</sub> with gradual increment of concentration of **9**, (right) Stern\_Volmer plot for phosphorescence quenching of **10**@OA<sub>2</sub> by **9** using phosphorescence lifetimes ( $\tau_0/\tau$ ) quenching constant  $k_q = (5.7 \times 10^8 \text{ M}^{-1} \text{ s}^{-1})$ .

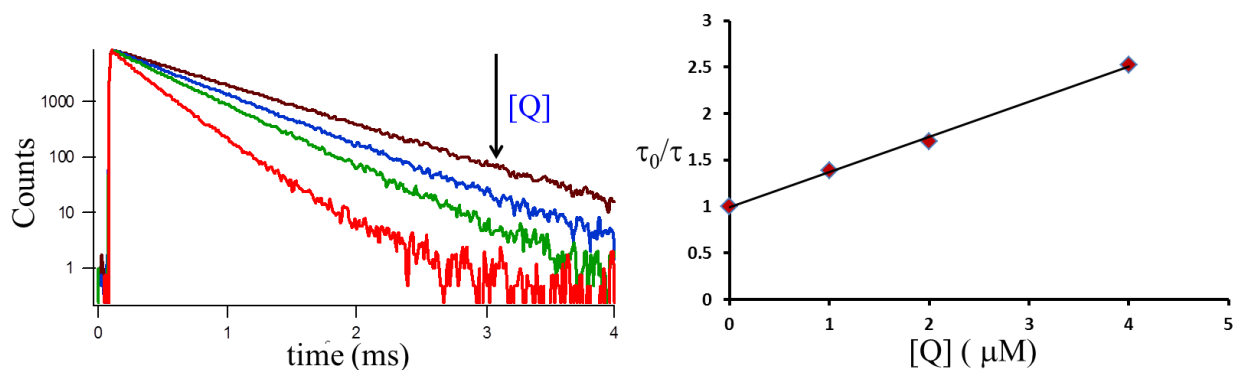

**Figure S14** (left) Plot showing the quenching of triplet lifetime of **8**@OA<sub>2</sub> with gradual increment of concentration of **8**, (right) Stern\_Volmer plot for phosphorescence quenching of **8**@OA<sub>2</sub> by **8** using phosphorescence lifetimes ( $\tau_0/\tau$ ) quenching constant  $k_q = (6.8 \times 10^8 \text{ M}^{-1} \text{ s}^{-1})$ .

**Table S1.** Diffusion coefficients of capsular assemblies at 25 °C by pulsed field gradient NMR.

| <b>Capsular assemblies</b>        | <b>H:G</b> | <b>Diffusion coefficient (cm<sup>2</sup>s<sup>-1</sup>)</b> |
|-----------------------------------|------------|-------------------------------------------------------------|
| 4,4'-Dimethylbenzil ( <b>10</b> ) | 2:1        | 1.3×10 <sup>-6</sup>                                        |
| 9-fluorenone ( <b>11</b> )        | 2:2        | 1.1×10 <sup>-6</sup>                                        |
| 1'-acetonaphthone ( <b>12</b> )   | 2:2        | 1.1×10 <sup>-6</sup>                                        |
| 2'-acetonaphthone ( <b>13</b> )   | 2:2        | 1.1×10 <sup>-6</sup>                                        |
| OA                                | -          | 1.88×10 <sup>-6</sup>                                       |
